# Supplementary material
Source: Springer Nature journal article supplement (https://www.springermedizin.de/resource/supplementary/12913_2011_2070_MOESM1_ESM.pdf/9529712)

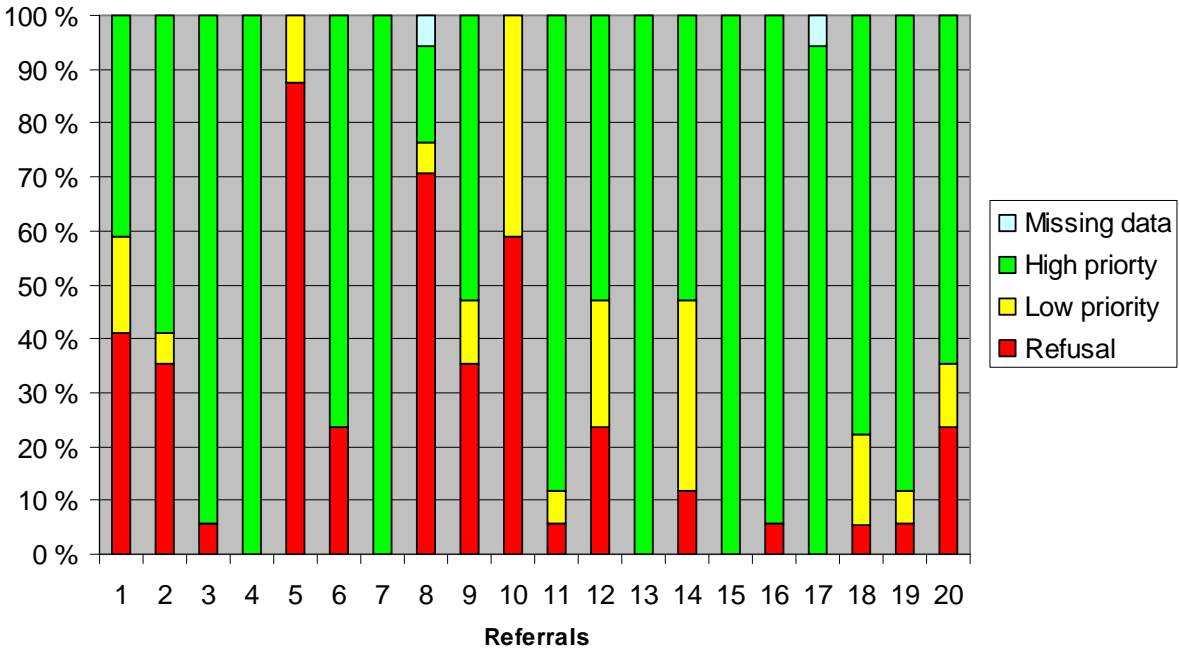

Supplement: MOESM1 [file 9529712]
